# Supplementary material for: Antitumor Efficacy of EGFR-Targeted Recombinant Immunotoxin in Human Head and Neck Squamous Cell Carcinoma
Source: Biology (Basel). 2022 Mar 22;11(4):486. doi: 10.3390/biology11040486 (PMC9027470; doi:10.3390/biology11040486)
Supplement: Supplementary file 1 [file biology-11-00486-s001.zip › biology-1625228-supplementary Figures S3-S6.pdf]

Supplementary Materials:

A

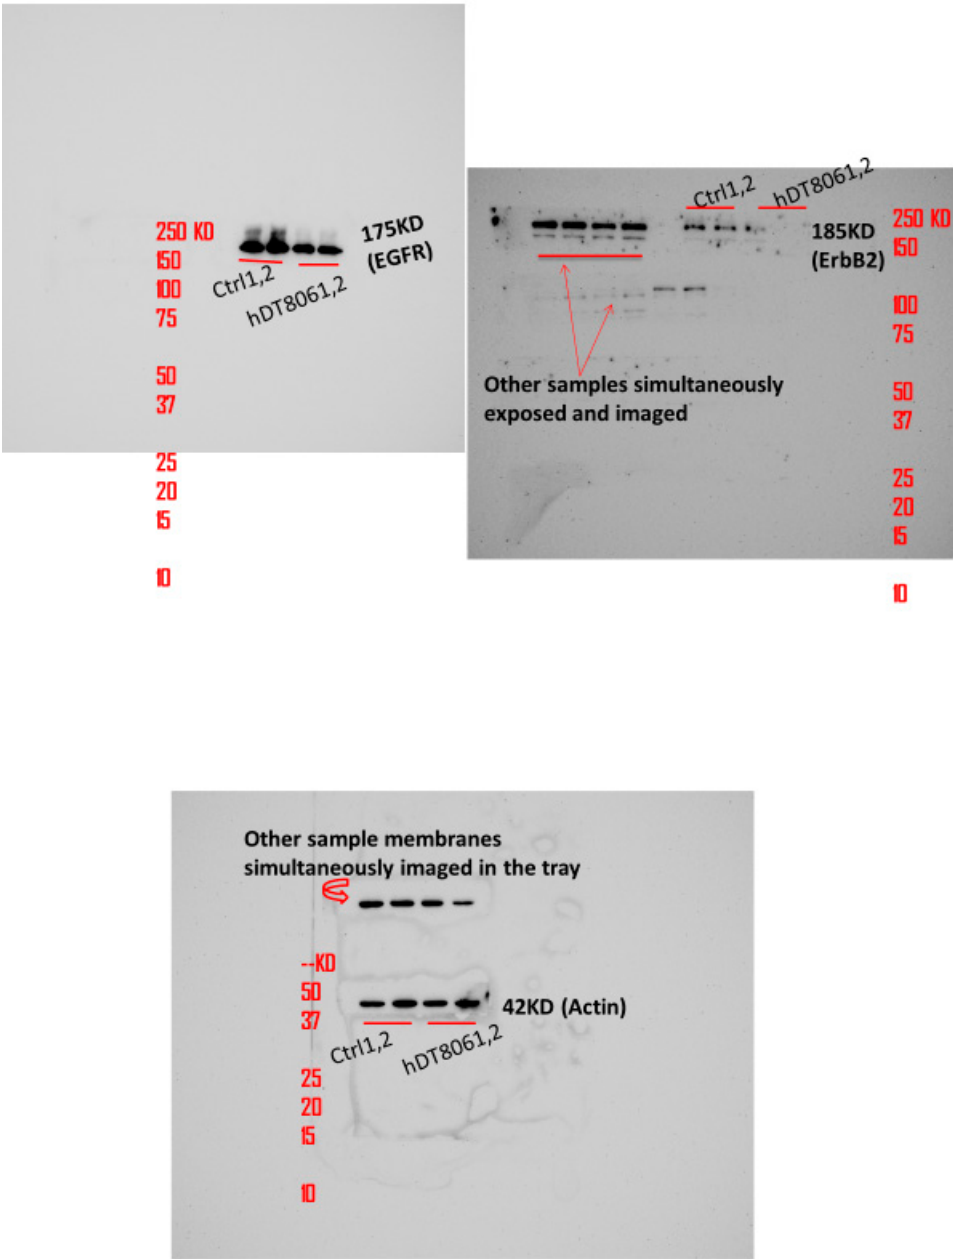

B

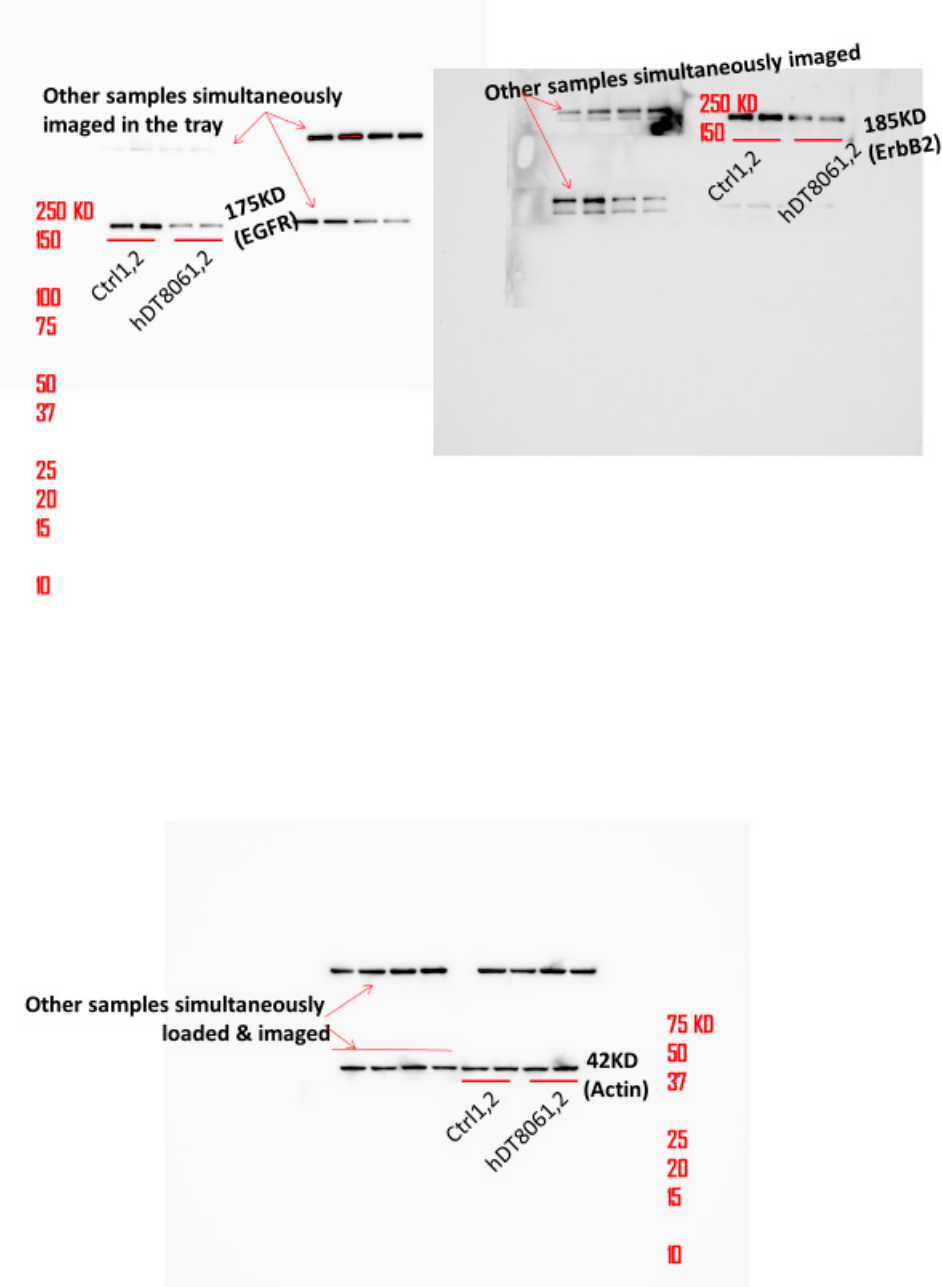

Figure S3: Analysis of hDT806 decreasing EGFR and ErbB2 in JHU-029 and JHU-022 cells.

A

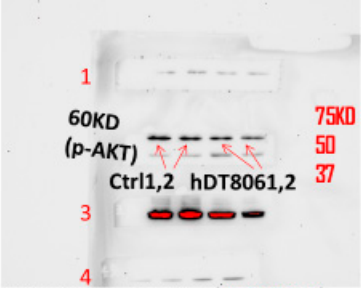

Note: other samples (Row 1,3,4) simultaneously exposed and imaged

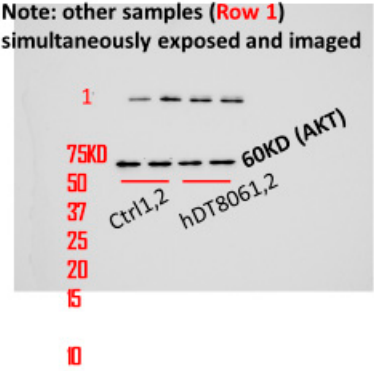

Note: other samples (Row 1) simultaneously exposed and imaged

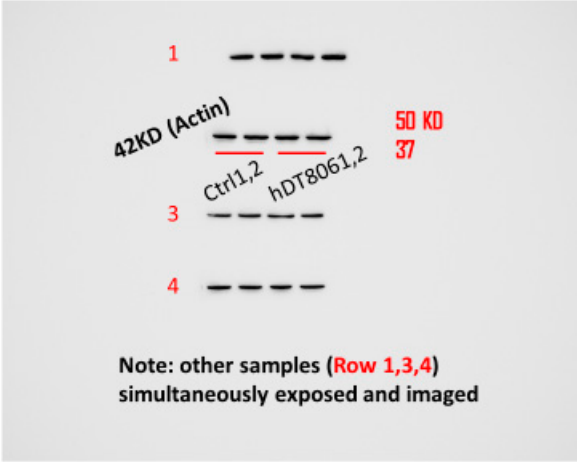

Note: other samples (Row 1,3,4) simultaneously exposed and imaged

B

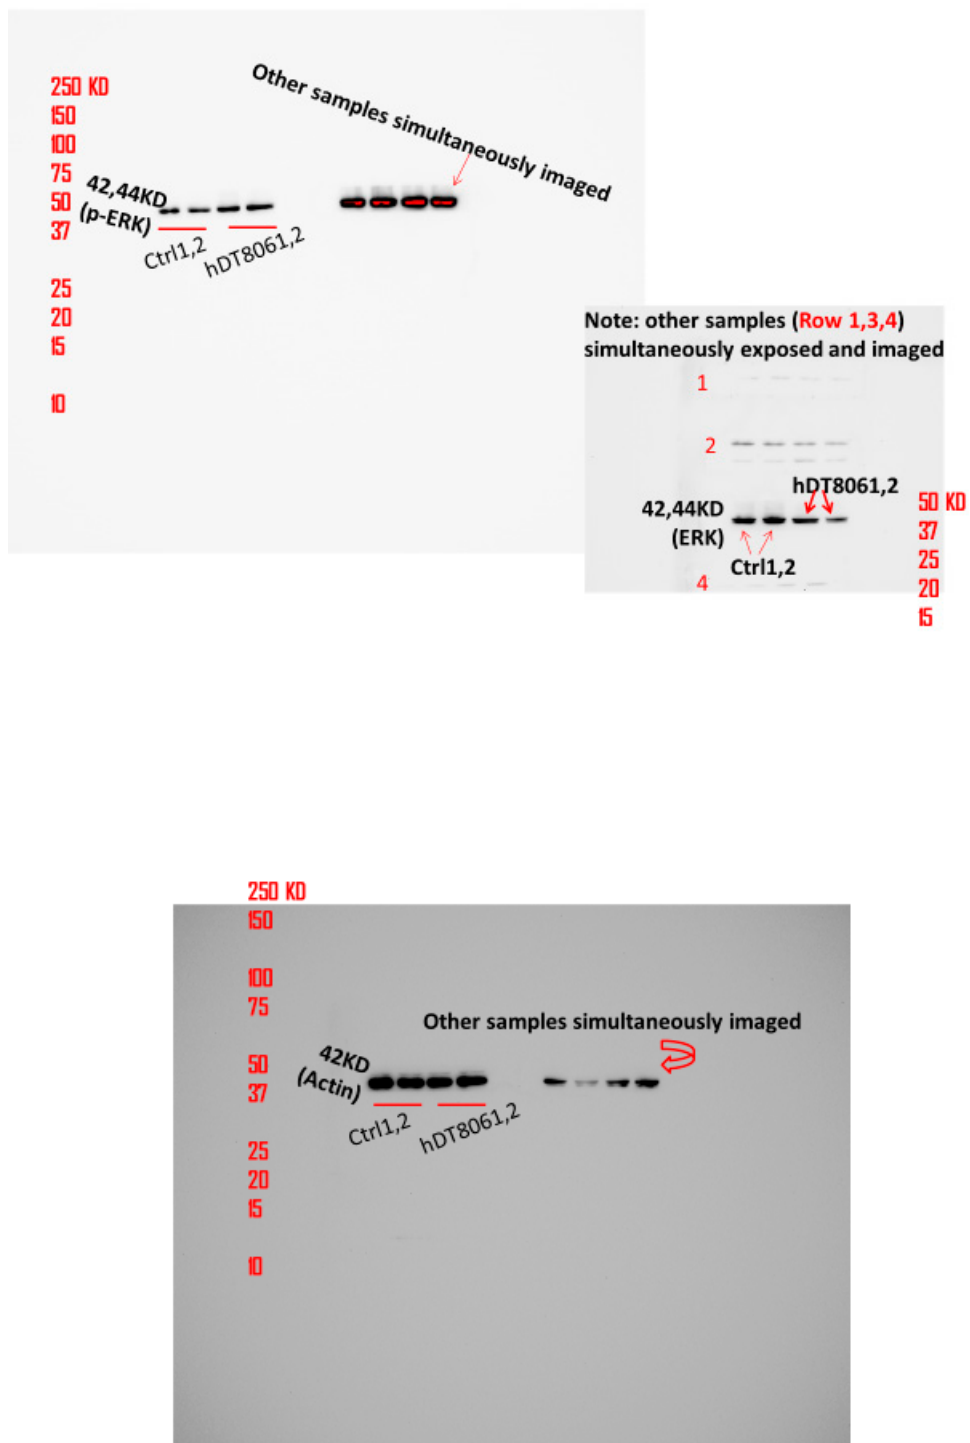

Figure S4: Analysis of hDT806 disruption of EGFR signaling and the downstream effectors, AKT as well as ERK1/2 in JHU-029 cells.

A

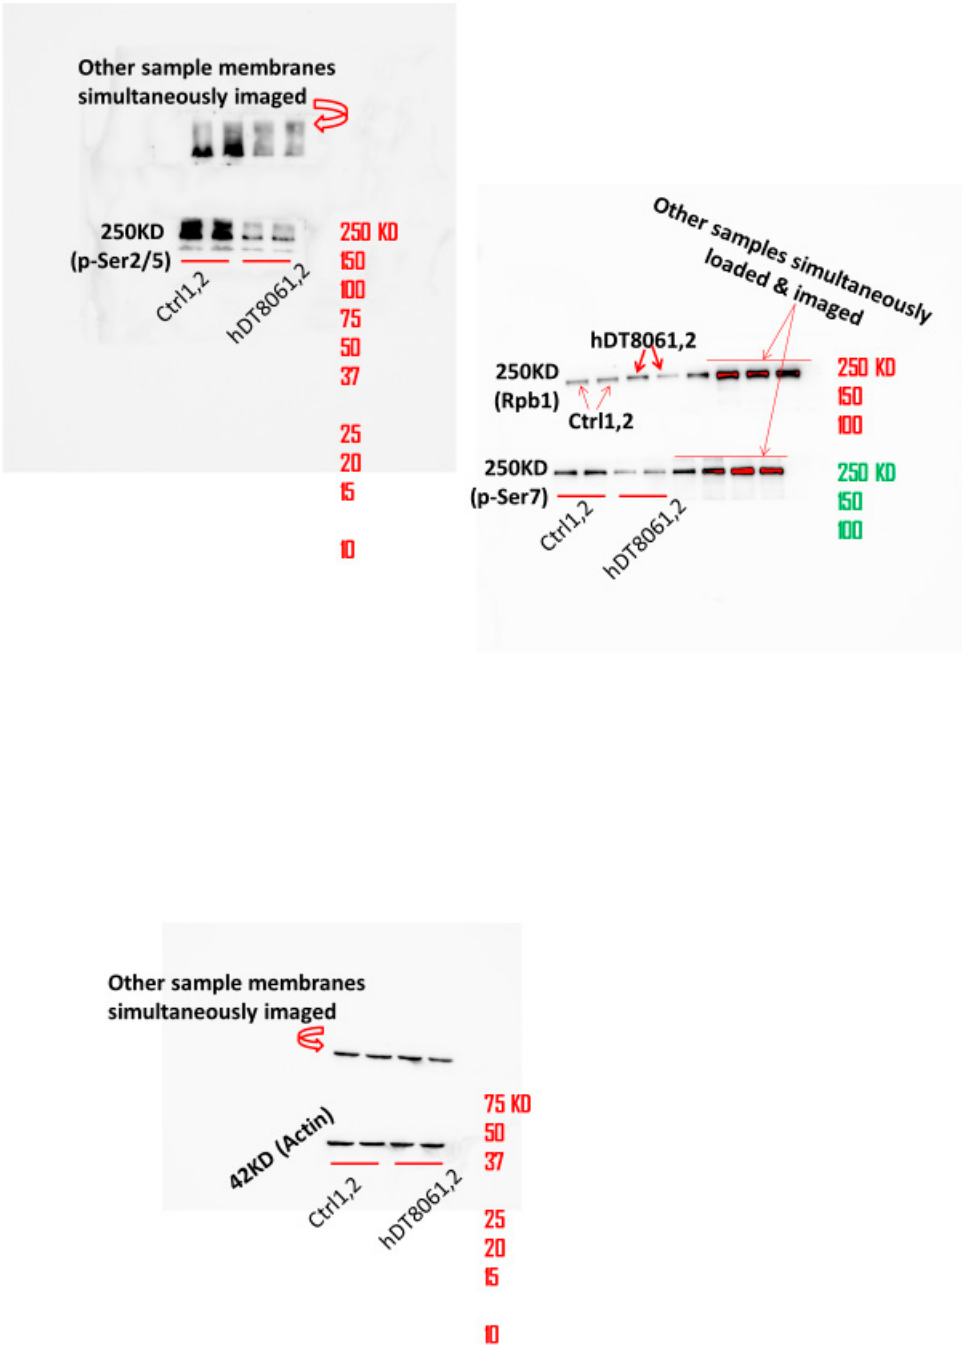

B

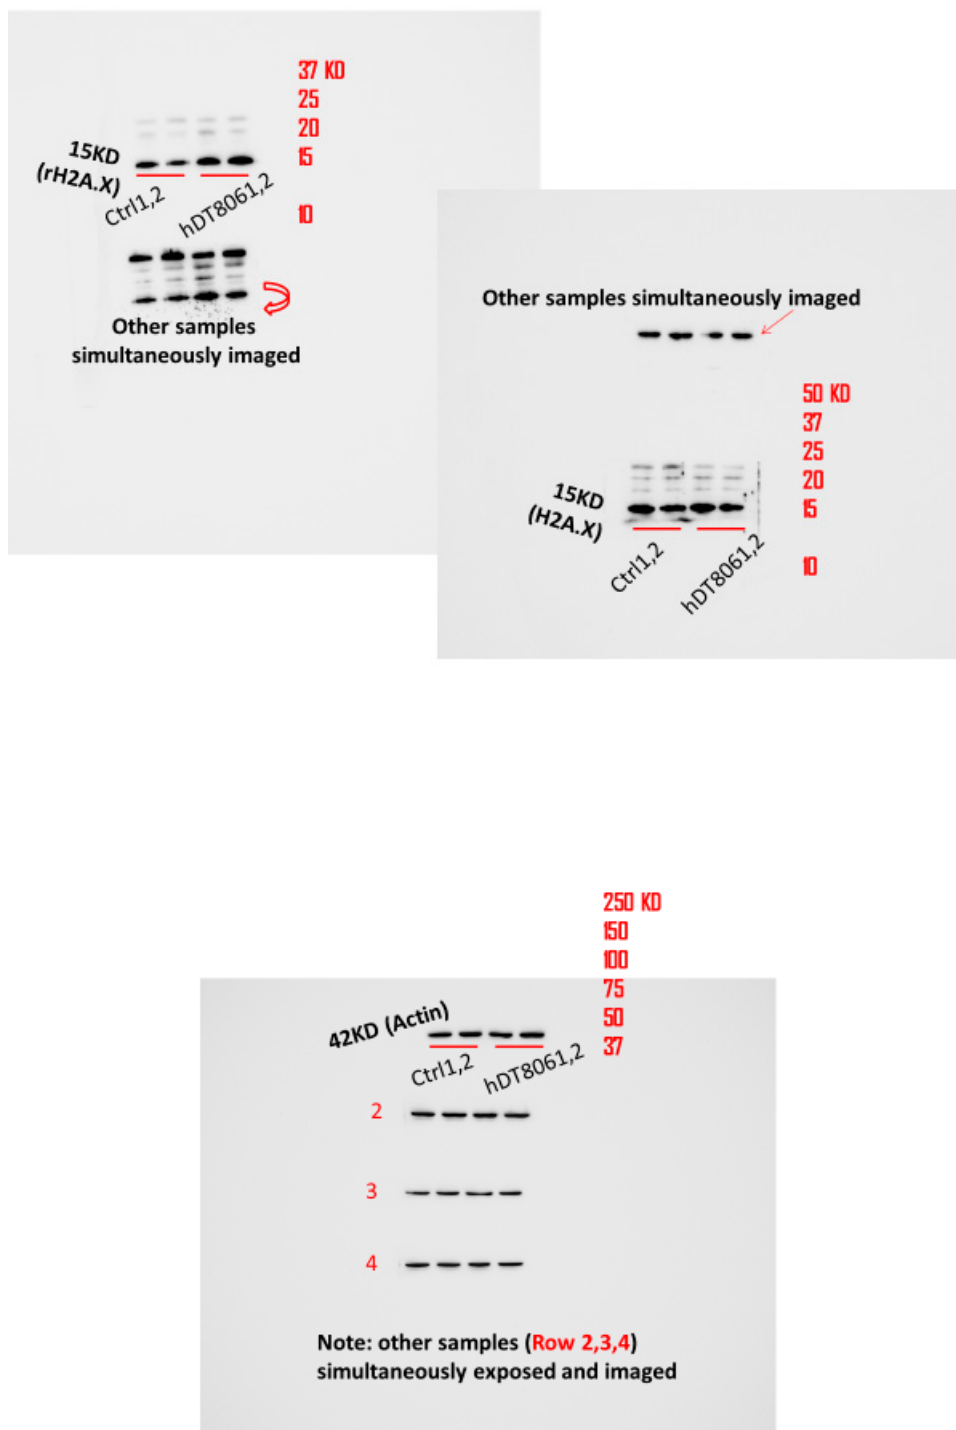

Figure S5: Analysis of hDT806 inducing transcription inhibition and DNA damage.

A

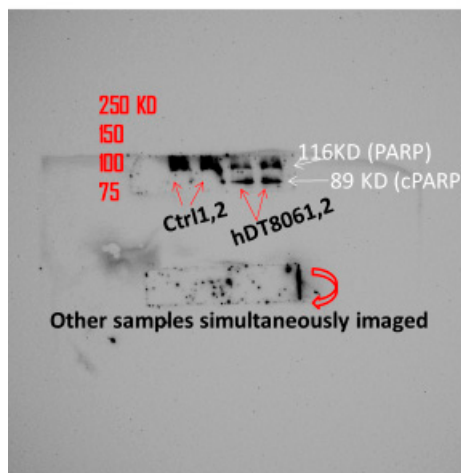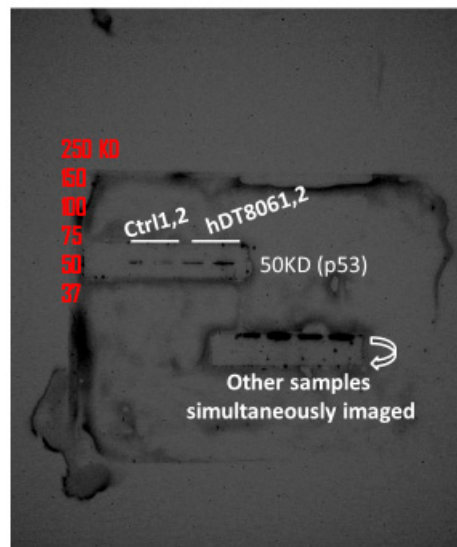

B

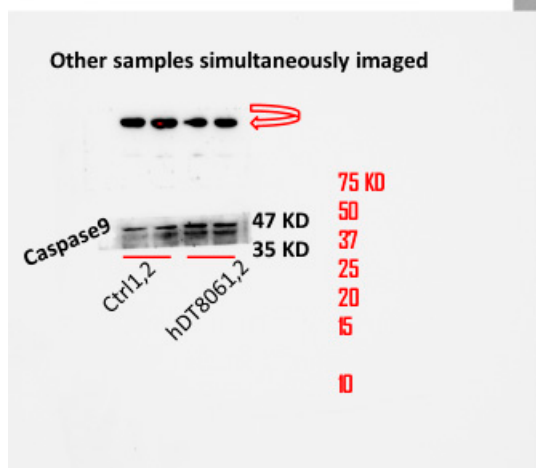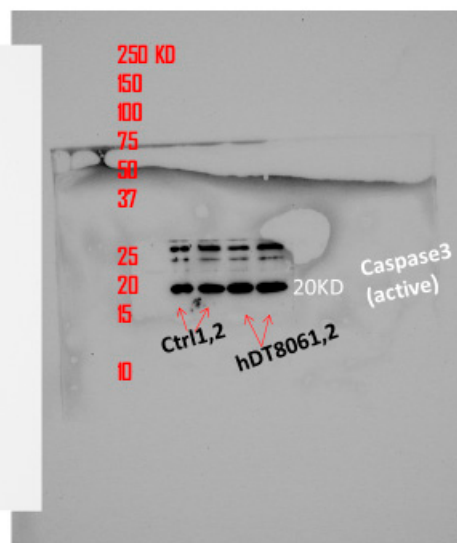

C

Note: other samples (Row 1,2,3) simultaneously exposed and imaged

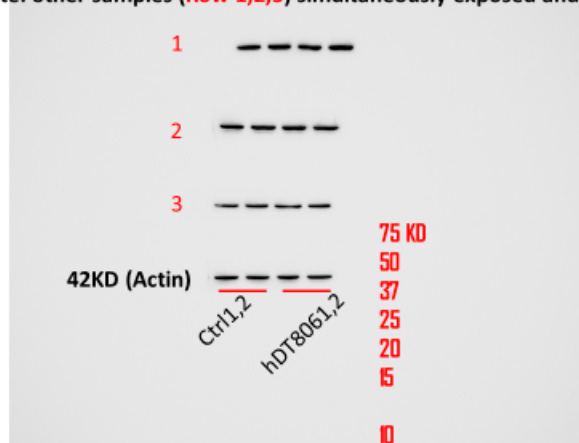

Figure S6: Ananalysis of apoptosis induced by hDT806 treatment in the JHU-029 cells.
